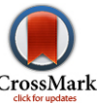

# Reduction of Hydrogen Peroxide Accumulation and Toxicity by a Catalase from *Mycoplasma iowae*

Rachel E. Pritchard<sup>1</sup>, Alexandre J. Prassinos<sup>1</sup>, John D. Osborne<sup>2</sup>, Ziv Raviv<sup>3‡</sup>, Mitchell F. Balish<sup>1\*</sup>

**1** Department of Microbiology, Miami University, Oxford, Ohio, United States of America, **2** Center for Clinical and Translational Science, University of Alabama at Birmingham, Birmingham, Alabama, United States of America, **3** Department of Veterinary Preventative Medicine, The Ohio State University, Columbus, Ohio, United States of America

## Abstract

*Mycoplasma iowae* is a well-established avian pathogen that can infect and damage many sites throughout the body. One potential mediator of cellular damage by mycoplasmas is the production of H<sub>2</sub>O<sub>2</sub> via a glycerol catabolic pathway whose genes are widespread amongst many mycoplasma species. Previous sequencing of *M. iowae* serovar I strain 695 revealed the presence of not only genes for H<sub>2</sub>O<sub>2</sub> production through glycerol catabolism but also the first documented mycoplasma gene for catalase, which degrades H<sub>2</sub>O<sub>2</sub>. To test the activity of *M. iowae* catalase in degrading H<sub>2</sub>O<sub>2</sub>, we studied catalase activity and H<sub>2</sub>O<sub>2</sub> accumulation by both *M. iowae* serovar K strain DK-CPA, whose genome we sequenced, and strains of the H<sub>2</sub>O<sub>2</sub>-producing species *Mycoplasma gallisepticum* engineered to produce *M. iowae* catalase by transformation with the *M. iowae* putative catalase gene, *katE*. H<sub>2</sub>O<sub>2</sub>-mediated virulence by *M. iowae* serovar K and catalase-producing *M. gallisepticum* transformants were also analyzed using a *Caenorhabditis elegans* toxicity assay, which has never previously been used in conjunction with mycoplasmas. We found that *M. iowae katE* encodes an active catalase that, when expressed in *M. gallisepticum*, reduces both the amount of H<sub>2</sub>O<sub>2</sub> produced and the amount of damage to *C. elegans* in the presence of glycerol. Therefore, the correlation between the presence of glycerol catabolism genes and the use of H<sub>2</sub>O<sub>2</sub> as a virulence factor by mycoplasmas might not be absolute.

**Citation:** Pritchard RE, Prassinos AJ, Osborne JD, Raviv Z, Balish MF (2014) Reduction of Hydrogen Peroxide Accumulation and Toxicity by a Catalase from *Mycoplasma iowae*. PLoS ONE 9(8): e105188. doi:10.1371/journal.pone.0105188

**Editor:** Glenn Francis Browning, The University of Melbourne, Australia

**Received:** April 11, 2014; **Accepted:** July 19, 2014; **Published:** August 15, 2014

**Copyright:** © 2014 Pritchard et al. This is an open-access article distributed under the terms of the Creative Commons Attribution License, which permits unrestricted use, distribution, and reproduction in any medium, provided the original author and source are credited.

**Data Availability:** The authors confirm that all data underlying the findings are fully available without restriction. All *Mycoplasma iowae* genome sequence files are available from the DDBJ/EMBL/GenBank database (accession number AWQU00000000).

**Funding:** This work was supported by the National Institutes of Health (www.nih.gov) Public Service Grant R15 AI073994 to MFB, by funding from Hybrid Turkeys (www.hybridturkeys.com), Kitchener, Ontario, Canada to ZR, and by the Miami University Doctoral-Undergraduate Opportunities in Scholarship Program (miamioh.edu) to REP and AJP. The funders had no role in study design, data collection and analysis, decision to publish, or preparation of the manuscript.

**Competing Interests:** MFB is currently an Academic Editor for PLOS ONE. This does not alter the authors' adherence to PLOS ONE Editorial policies and criteria. Part of the funding from this work was from Hybrid Turkeys, a commercial organization. There are no competing interests of any kind between this organization and the authors' work, and this does not alter the authors' adherence to PLOS ONE policies on sharing data and materials.

\* Email: balishmf@miamioh.edu

‡ Current address: Koret School of Veterinary Medicine, The Hebrew University, Rehovot, Israel

## Introduction

*Mycoplasma iowae* is an economically important avian mycoplasma primarily associated with turkeys but also occasionally found in chickens [1]. Naturally occurring infections in turkeys commonly result in late embryo mortality, leading to a 2–5% decrease in hatchability, and leg abnormalities in offspring [2–4]. Experimental infections give rise to airsacculitis, stunting, poor feathering, and/or leg and joint problems [3,4]. *M. iowae* can be recovered from the respiratory tract, gastrointestinal tract, spleen, and kidneys of orally infected day-old poults, suggesting invasiveness [5]. Atypically among cultured mycoplasmas, *M. iowae* exhibits a predilection for the intestinal tract. Yolk sac inoculation of eight-day old turkey embryos results in intestinal binding and colonization [6]. Oral inoculation of day-old poults also results in intestinal colonization with no signs of disease, with mycoplasmas isolated more frequently from the intestinal walls than its contents, for at least 21 d after inoculation [5].

Phylogenetically, *M. iowae* is in the *Mycoplasma muris* cluster within the pneumoniae group, with *Mycoplasma penetrans* as its

best-characterized relative [7]. *M. iowae* has a terminal organelle with an internal cytoskeleton; this organelle attaches to host cells and is the leading cell pole during gliding motility [6,8]. *M. iowae* is one of two known avian mycoplasmas, along with *Mycoplasma lipofaciens*, that can obtain energy from catabolism of both glucose and arginine [9,10]. Despite considerable understanding of disease pathology resulting from *M. iowae* infection, as well as some knowledge about its cellular biology and biochemistry, the virulence factors of *M. iowae* are unidentified.

A draft genome sequence for *M. iowae* serovar I strain 695 [11] suggests some potential primary virulence factors, including two copies of genes for proteins related to an ADP-ribosylating and vacuolating toxin characterized in *Mycoplasma pneumoniae* [12] as well as genes for production of H<sub>2</sub>O<sub>2</sub> through glycerol catabolism, a pathway that is widespread among mycoplasmas. In this pathway glycerol is imported into the cell via either the glycerol facilitator GlpF or an ABC transporter, phosphorylated by GlpK, and finally oxidized to dihydroxyacetone phosphate by GlpO (also known as GlpD in some species), using O<sub>2</sub> and resulting in production of H<sub>2</sub>O<sub>2</sub> [13,14]. The H<sub>2</sub>O<sub>2</sub> generated by

GlpO can cause cellular damage either directly or through altering host gene expression [15]. H<sub>2</sub>O<sub>2</sub> has been described as a virulence factor for several pathogenic mycoplasmas, including *Mycoplasma mycoides* subsp. *mycoides*, *Mycoplasma pneumoniae*, and *Mycoplasma pulmonis*. Onset time of pneumonia caused by *M. pulmonis* infection is shortened in mice lacking catalase activity, implicating H<sub>2</sub>O<sub>2</sub> [16]. A *glpD* mutant of *M. pneumoniae* produces less H<sub>2</sub>O<sub>2</sub> and causes less cytotoxicity than wild-type cells [14]. An *M. mycoides* strain that lacks components of the glycerol ABC transporter produces less H<sub>2</sub>O<sub>2</sub> and causes disease with delayed onset and decreased severity in experimentally infected cattle as compared with a strain that has all the transport [17–19]. Several enzymes have been implicated in reversing H<sub>2</sub>O<sub>2</sub>-mediated damage to mycoplasma cells [20,21], but direct degradation of H<sub>2</sub>O<sub>2</sub> has not been described for these organisms.

It is unclear how well the existence of the glycerol catabolic pathway correlates with actual use of H<sub>2</sub>O<sub>2</sub> as a virulence factor by mycoplasmas. The *M. iowae* serovar I genome sequence indicates the presence of *glpF*, *glpO*, and *glpK* [11], which could be taken to support a role for H<sub>2</sub>O<sub>2</sub> in virulence of this organism. Thus far uniquely among mycoplasmas, it also contains a gene encoding a putative catalase, an enzyme that degrades H<sub>2</sub>O<sub>2</sub>, potentially interfering with H<sub>2</sub>O<sub>2</sub>-mediated virulence. In this report, we present the genome sequence of *M. iowae* serovar K strain DK-CPA, which also contains both the glycerol catabolism genes and the catalase gene, which we designate *katE*. The activity of the *katE* gene product as a catalase was tested by assaying for catalase activity in both *M. iowae* serovar K and *katE* transformants of *Mycoplasma gallisepticum*, a prolific H<sub>2</sub>O<sub>2</sub> producer. All strains were also analyzed for the impact of *M. iowae* catalase on H<sub>2</sub>O<sub>2</sub> production and resulting virulence via *Caenorhabditis elegans* toxicity assays modified for use with mycoplasmas. Our results, which constitute the first account of an active catalase in mycoplasmas, allow us to address the question of H<sub>2</sub>O<sub>2</sub> as an *M. iowae* virulence factor.

## Materials and Methods

### Bacterial strains and growth conditions

Strains used in this study include *M. iowae* serovar K strain DK-CPA, *Mycoplasma genitalium* strain G37, *M. gallisepticum* strain R<sub>low</sub>, and *M. gallisepticum* transformants 55A–C and 56 A and C. All strains were grown at 37°C in 175-cm<sup>2</sup> tissue culture flasks containing 50 mL SP-4 media [22] to mid-log phase (orange color). Transformants 55A–C and 56 A and C were grown in the presence of 4 µg mL<sup>-1</sup> tetracycline. *Escherichia coli* strain DH5α was used for cloning and was grown in Luria-Bertani broth in the presence of 100 µg mL<sup>-1</sup> ampicillin or 4 µg mL<sup>-1</sup> tetracycline.

### Genome sequencing and analysis

Genomic DNA from *M. iowae* serovar K was sequenced at the Ohio State University Plant-Microbe Genomics Facility using the GS FLX system (454 Life Sciences). It was prepared with the GS FLX Titanium Rapid Library Preparation Kit (Roche) and sequenced using GS FLX Titanium Sequencing Kit XLR70. Shotgun sequencing data were assembled with the GS *De Novo* Assembler version 2.5.3 (Roche). Annotation was performed as previously described [23]. The draft genome project has been deposited at DDBJ/EMBL/GenBank under accession number AWQU00000000. The draft genomes of serovars K and I were compared using wgVISTA [24].

### Catalase sequence analysis

The predicted amino acid sequence of *M. iowae* serovar K catalase was subjected to PSI-BLAST [25]. Matches reported as having e values of 0 were aligned by CLUSTALX 2.1 [26] using default parameters and the phylogram was inspected using NJplot [27]. Sequences that clustered separately from the group that included *M. iowae* catalase were removed and the remaining sequences were again subjected to alignment and tree generation. Secondary structure was predicted using SOPMA [28].

### Detection of catalase activity

Cells from mid-log phase cultures of *M. iowae*, *M. gallisepticum*, and *M. gallisepticum* transformants were collected by centrifugation at 20,000×g for 20 min and washed three times with cold phosphate-buffered saline (PBS). Cells were smeared onto a clean microscope slide and one drop of 3% H<sub>2</sub>O<sub>2</sub> was added. Catalase activity was indicated by the generation of bubbles.

To analyze H<sub>2</sub>O<sub>2</sub> degradation, *M. iowae* and *M. genitalium* were grown in 24-well plate wells containing 1 mL of SP-4 media supplemented with 3% glycerol. Upon reaching mid-log phase, 1 mL of SP-4 containing 3% glycerol or mid-log phase *M. iowae* culture was added to *M. genitalium* culture and the amount of H<sub>2</sub>O<sub>2</sub> remaining was measured over time using colorimetric test strips (EM Quant, range 0.5–25 mg L<sup>-1</sup>). Statistical analysis of results was calculated using repeated measures ANOVA and unpaired Student's T-test. Results represent three biological replicates with one technical replicate each.

### Construction of plasmids and transformation with *M. iowae katE*

To amplify *M. iowae katE* with a *SalI* cloning site with or without the addition of a C-terminal 6xHis tag, primers upstream (5'-ATCGGTTCGACAAATGCTGCAACAGCTGCAC-3') and downstream (5'-ATCGGTTCGACTAAACACAAAATTTGATT-TAATC-3' or 5'-ATCGGTTCGACTTAATGATGGT-GATGGTGGTGACCATATGCGTTTAAATGGCAAGGT-3', respectively) were synthesized (Fisher Scientific) and used for PCR with LongAmp Polymerase (NEB). Following addition of A overhangs using *Taq* polymerase (NEB), PCR products were ligated into linearized plasmid pCR2.1 (Invitrogen) and transformed into chemically competent *E. coli* cells. Sequencing at the Miami University Center for Bioinformatics and Functional Genomics confirmed 100% sequence identity to *M. iowae katE*. The resulting plasmids were named pOO54 and pOO53, respectively. These plasmids were digested with *SalI* and the resulting 1.8-kb DNA fragments were ligated together with pTF20 [29] that had been linearized using *SalI*. The resulting plasmids were named pOO56 and pOO55, respectively.

To produce *M. gallisepticum katE* transformants, electrocompetent *M. gallisepticum* cells were transformed with pOO55 and pOO56 as previously described [30]. Transformants were plated on SP-4 plates containing 4 µg mL<sup>-1</sup> tetracycline for selection. Transformants were subjected to three rounds of filter cloning and more than one transformant from each series (named 55A–C and 56 A and C) was analyzed to ensure that results observed were not due to polar effects from the chromosomal transposon insertion site.

### H<sub>2</sub>O<sub>2</sub> assay

Methods were adapted from Hames *et al.* [14]. Fifty-mL cultures of mycoplasmas were grown to mid-log phase. Cells were collected by centrifugation at 20,000×g for 20 min and washed three times with cold buffer containing 67.6 mM HEPES,

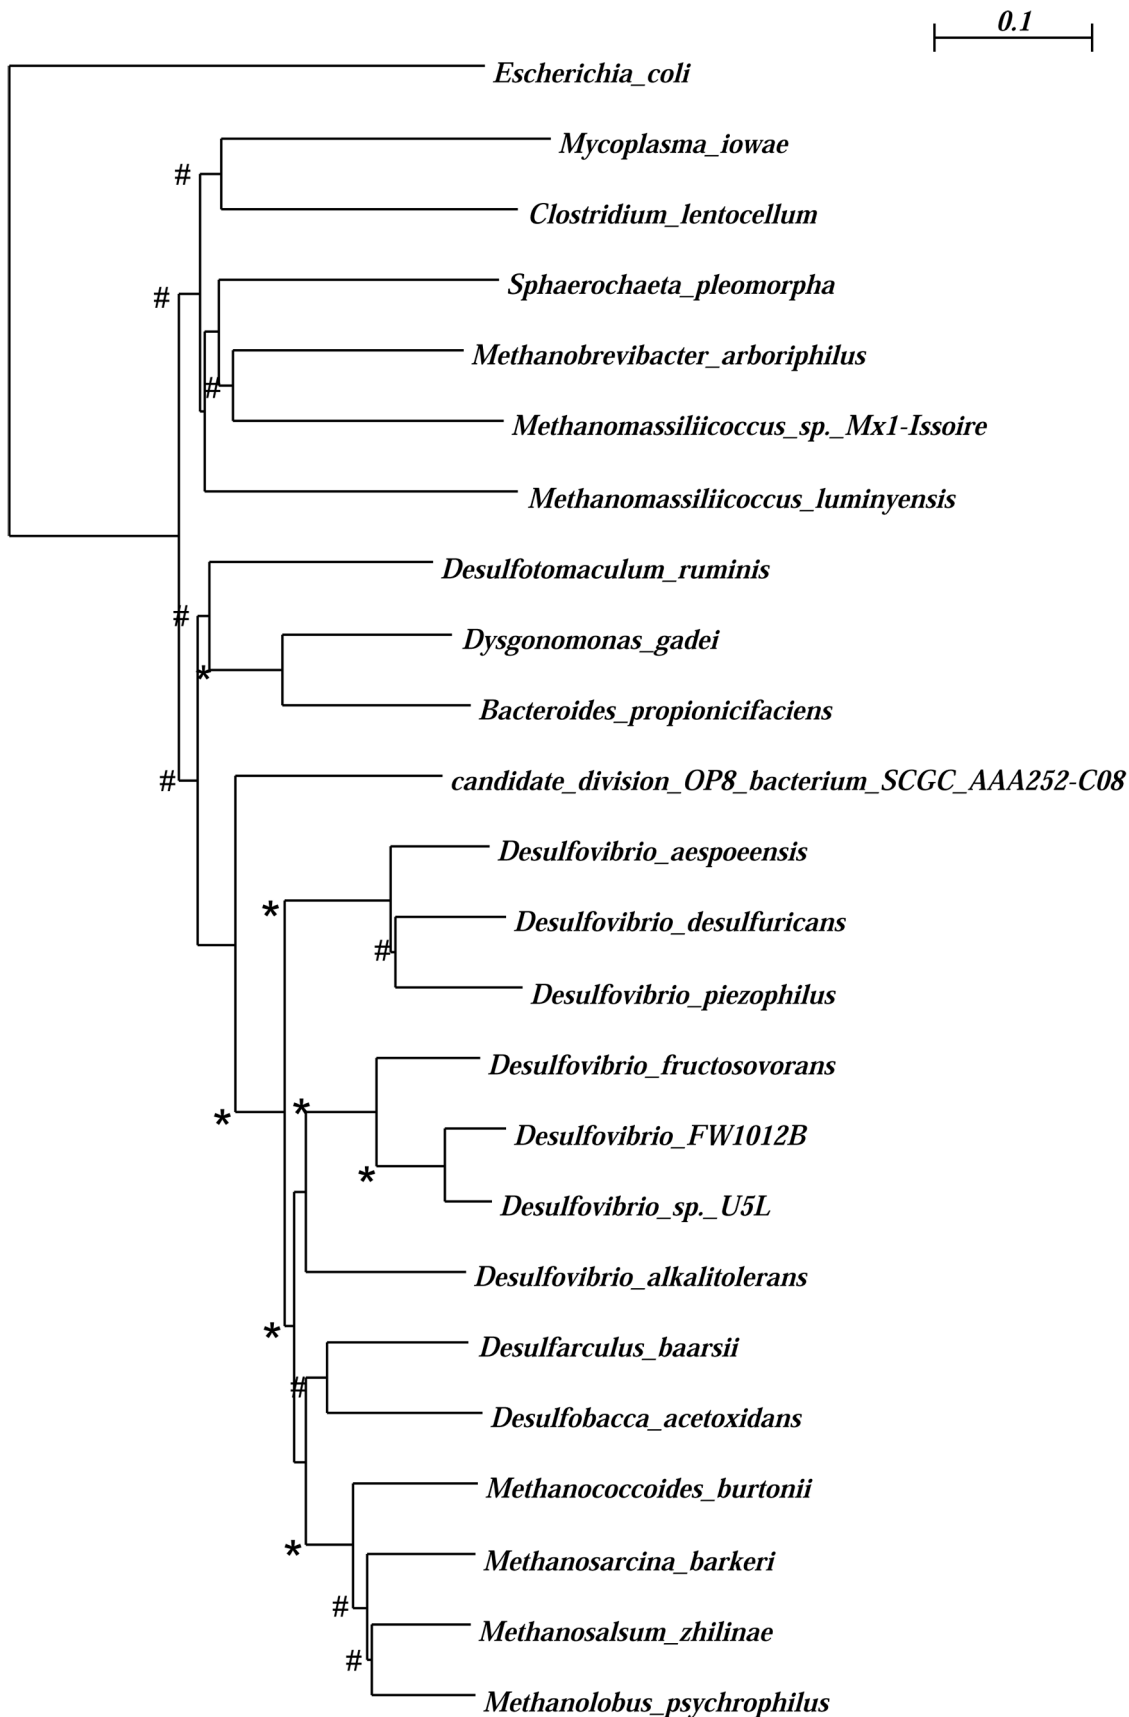

**Figure 1. Phylogenetic tree of *M. iowae* serovar K catalase and close relatives, with *Escherichia coli* *katE* as an outgroup.** All amino acid sequences included have an e value reported as 0 by PSI-BLAST with respect to *M. iowae* catalase. Scale bar, 0.05 substitutions per site. Bootstrap values out of 1000 trials are reported at nodes.  
doi:10.1371/journal.pone.0105188.g001

140 mM NaCl, and 7 mM MgCl<sub>2</sub>. Following resuspension to an OD<sub>550</sub> of 1.0, 1-mL aliquots were placed in microcentrifuge tubes and incubated at 37°C for 1 h. 100 μM glycerol was added to tubes and samples were incubated at 37°C for an additional 2 h. H<sub>2</sub>O<sub>2</sub> levels were measured using colorimetric test strips. All analyses were performed in quadruplicate. Median and median absolute deviations values were calculated. Statistical significance of results was calculated using one-way ANOVA and Tukey's *post hoc* test. Results represent three biological replicates with at least two technical replicates each.

### Preparation of cell extracts

Fifty-mL cultures of mycoplasma cells were collected by centrifugation at 20,000×g for 20 min and washed three times with cold PBS. The resulting cell pellet was resuspended in 1 mL cold PBS containing 1% sodium dodecyl sulfate and incubated at 37°C for 30 min. Protein concentration in cell lysates was determined using BCA assays (Pierce).

### Western blot analysis

Five μg of cell lysates was separated on a 10% sodium dodecyl sulfate-polyacrylamide gel. Following electrophoresis, proteins were transferred to a nitrocellulose membrane (GE) overnight at 100 mAmp. Membrane was probed with anti-6XHis primary antibodies (Immunology Consultants Laboratory, Inc.) at a dilution of 1:1,000 followed by anti-rabbit immunoglobulin G-alkaline phosphatase secondary antibodies (Promega) at a dilution of 1:7,500. Bands were visualized with 5-bromo-4-chloro-3-indolyl phosphate and nitro-blue tetrazolium.

### PCR analysis

Primers were designed to encompass *M. gallisepticum glpF*, *glpO*, and *glpK* to confirm absence of transposon insertion at this locus. Primers (5'-TCAAGTTCTGCTAGTAGCGG-3' and 5'-AATGTATCAGATCACGACC-3') were synthesized (Fisher Scientific) and used with *Taq* polymerase for PCR with chromosomal DNA. PCR products were subjected to agarose gel electrophoresis and transformants were compared to *M. gallisepticum* R<sub>low</sub>.

### Caenorhabditis elegans growth conditions

All assays were performed with *C. elegans* N2 (Bristol). Nematodes were cultivated using standard practices [31]. Briefly, worms were cultivated on Nematode Growth Media (NGM) plates seeded with *E. coli* strain OP50 as a food source at room temperature on the bench top.

### C. elegans killing assays

Plates containing many large, gravid nematodes were bleached to obtain sterile eggs using standard procedures [31]. Eggs were hatched overnight in 10 mL of M9 buffer to obtain L1 larvae. Following incubation with 1 mM glycerol for 5–6 h, L1 larvae were washed with and resuspended in M9 buffer, and approximately 20–40 larvae were aliquotted into 24-well plate wells. The number of live worms per well (indicated by the presence of movement) was counted prior to adding any additional sample. Plates were incubated at room temperature on the bench top for 24 h and live worms were counted to measure survival. Worms were considered dead if they showed no movement in response to shaking of the plate.

To determine the susceptibility of worms to H<sub>2</sub>O<sub>2</sub> using our assay conditions, L1 larvae were incubated with 1 mL of buffer containing 67.6 mM HEPES, 140 mM NaCl, and 7 mM MgCl<sub>2</sub>

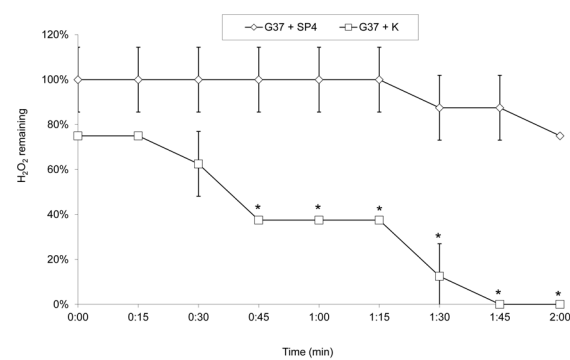

**Figure 2. Degradation of H<sub>2</sub>O<sub>2</sub> produced by an exogenous source of by *M. iowae*.** H<sub>2</sub>O<sub>2</sub> present in a mid-log phase culture of *M. genitalium* G37 was measured following the addition of an equal amount of SP-4 media (◇) or mid-log phase *M. iowae* serovar K culture (□). Error bars, SD. \*, *p*<0.05 compared to control as determined by Student's T-test.

doi:10.1371/journal.pone.0105188.g002

and various concentrations of H<sub>2</sub>O<sub>2</sub>. Survival was measured at 24 h as described above. Statistical significance of results was calculated using one-way ANOVA. Results represent three biological replicates with at least two technical replicates each.

Mycoplasma samples were processed as described for hydrogen peroxide assays. Following initial 1-h incubation at 37°C, 1-mL samples were added to 24-well plate wells containing counted nematodes and glycerol. Worm survival was measured after 24 h incubation at room temperature. Conditions were optimized for maximum H<sub>2</sub>O<sub>2</sub> production at room temperature by varying the OD<sub>550</sub> of *M. gallisepticum* R<sub>low</sub> and concentrations of glycerol. The concentration of H<sub>2</sub>O<sub>2</sub> under these optimized conditions was established at 2-h intervals for each strain using the colorimetric test strips. Final nematode killing assays were performed with mycoplasmas at an OD<sub>550</sub> of 0.75 in the presence or absence of 1 mM glycerol. Statistical significance of results was calculated using one-way ANOVA with Tukey's *post hoc* test and unpaired Student's T-test. Results represent three biological replicates with at least two technical replicates each.

## Results

### Analysis of *M. iowae* serovar K for catalase activity

We obtained a draft genome sequence of *M. iowae* serovar K, isolated from a turkey embryo [32]. The genomes of serovars K and I, which was isolated from a turkey air sac [32], are well conserved, with >99% nucleotide sequence conservation in most genes, and more substantive differences in genes encoding predicted lipoproteins and some hypothetical proteins. Differences in gene content are almost completely restricted to restriction systems, transposase fragments, and lipoprotein paralogs, plus the deletion in serovar K of two putative glycoconjugate synthesis genes.

*glpF*, *glpK*, and *glpO* were present, constituting a complete pathway for assimilation of free glycerol and H<sub>2</sub>O<sub>2</sub> production. However, *glpU* and *glpQ*, which import and break down host glycerophospholipids to glycerol-3-phosphate, the substrate for GlpO [33,34], were absent. These findings suggest that *M. iowae* cannot use host cell phospholipids as a source of glycerol, leaving free glycerol, perhaps derived from host cells and/or other microflora, as the only source of substrate for GlpO. Although the genome had a typical complement of mycoplasma genes associated with antioxidant functions, including genes encoding

**Table 1.** Catalase activity and H<sub>2</sub>O<sub>2</sub> production by *M. iowae* serovar K, *M. gallisepticum* R<sub>low</sub>, and *M. gallisepticum* 55 and 56 series transformants containing *M. iowae* *katE*.

| Strain                                   | Catalase activity | H <sub>2</sub> O <sub>2</sub> production (mg L <sup>-1</sup> ) |                 |
|------------------------------------------|-------------------|----------------------------------------------------------------|-----------------|
|                                          |                   | 100 μM glucose                                                 | 100 μM glycerol |
| <i>M. iowae</i> serovar K                | +                 | 0±0*                                                           | 0±0*            |
| <i>M. gallisepticum</i> R <sub>low</sub> | –                 | 1.6±0.1                                                        | 3.8±0.3         |
| 55A                                      | +                 | 0±0*                                                           | 0±0*            |
| 55B                                      | +                 | 0±0*                                                           | 0±0*            |
| 55C                                      | +                 | 0±0*                                                           | 0.1±0.1*        |
| 56A                                      | +                 | 0±0*                                                           | 0±0*            |
| 56C                                      | +                 | 0.3±0.3*                                                       | 0.6±0.4*        |

\**P*<0.05 compared to *M. gallisepticum* R<sub>low</sub> H<sub>2</sub>O<sub>2</sub> production with respective carbohydrate.  
doi:10.1371/journal.pone.0105188.t001

lipid hydroperoxide peroxidase, glutathione peroxidase, thioredoxins and thioredoxin reductases, flavodoxin and flavodoxin reductase, peroxiredoxin, and an OsmC-like protein possibly functioning in organic hydroperoxide reduction, two other genes stood out. One was a gene for superoxide dismutase, which among mycoplasmas has been found only in *Mycoplasma haemofelis* and *Mycoplasma haemocanis* [35,36]. The other was a gene for catalase, which we call *katE*. It is present in both serovar K and

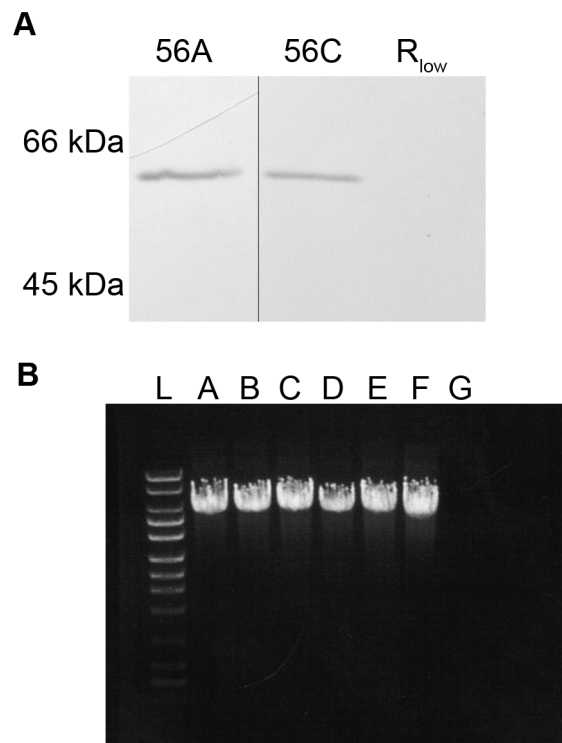

**Figure 3. Production of catalase and integrity of glycerol metabolism operon in *M. gallisepticum* transformants.** (a) Immunoblot of *M. gallisepticum* transformants 56A and 56C and *M. gallisepticum* R<sub>low</sub> with anti-6X-His antibodies. (b) PCR products using primers for the putative *glpFOK* operon of *M. gallisepticum*. L, ladder with bands at 10, 8, 6, 5, 4, 3, 2.5, 2, 1.5, 1, 0.7, and 0.5 kb; A, *M. gallisepticum* R<sub>low</sub>; B–D, *M. gallisepticum* transformants 55A–C; E–F, *M. gallisepticum* transformants 56A and C; G, *M. iowae* serovar K.  
doi:10.1371/journal.pone.0105188.g003

the previously published serovar I [11], and the nucleotide sequence is nearly identical both in the coding region and the 434-bp non-coding region upstream. The predicted amino acid sequence for *M. iowae* serovar K catalase had 61% sequence identity to a homolog in the archaeon *Methanobrevibacter arboriphilus*, whose heme-dependent catalase activity has been characterized [37]. The predicted catalase protein contains all conserved amino acids of clade 3 heme-binding catalases as indicated on the Conserved Domain Database (CDD) [38], a group which it matches with an e-value of less than 10<sup>-100</sup>. Its closest relatives are all found in anaerobic prokaryotes (Fig. 1), among which *Clostridium lentocellum* and *Desulfotomaculum ruminis* are the only members of the closely related *Firmicutes* lineage. The lack of a close relationship with catalases from most *Firmicutes* is more consistent with *M. iowae* having acquired *katE* by horizontal gene transfer from an anaerobe than having retained it during evolution from a common ancestor with Gram-positive bacteria. Sequence alignment reveals conservation of predicted secondary structural elements and active site residues (Fig. S1).

The presence of *katE* in *M. iowae* constitutes the first published account of a catalase gene in any mycoplasma species to date. Catalase activity was assessed in whole cells of *M. iowae* serovar K and *M. gallisepticum* strain R<sub>low</sub>, which has no catalase gene. Upon the addition of 3% H<sub>2</sub>O<sub>2</sub>, *M. iowae* produced robust bubbling which was absent from *M. gallisepticum* (Table 1),

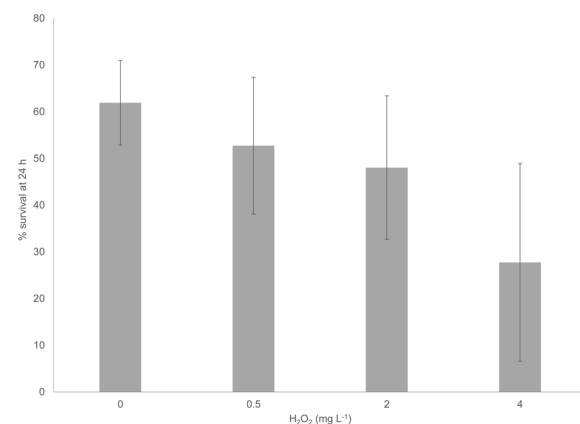

**Figure 4. Survival of *C. elegans* upon exposure to increasing concentrations of H<sub>2</sub>O<sub>2</sub>.** Error bars, SD.  
doi:10.1371/journal.pone.0105188.g004

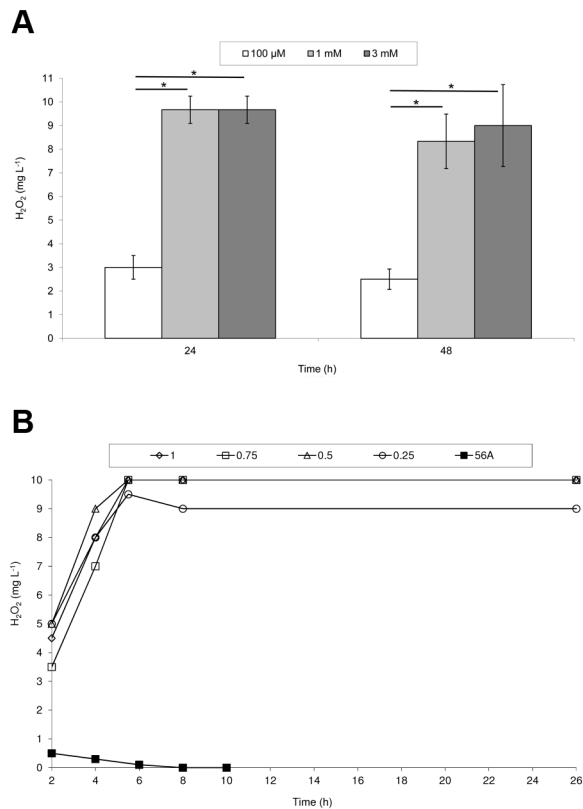

**Figure 5. H<sub>2</sub>O<sub>2</sub> accumulation by different amounts of *M. gallisepticum* with varying glycerol concentrations.** (a) *M. gallisepticum* R<sub>low</sub> at an OD<sub>550</sub> of 1.0 with 100 μM (white bars), 1 mM (light grey bars), or 3 mM (dark grey bars) glycerol. Experiments were performed in triplicate. \*,  $p < 0.05$  as determined by one-way ANOVA and Tukey's *post hoc* test. (b) *M. gallisepticum* R<sub>low</sub> at an OD<sub>550</sub> of 1 (◇), 0.75 (□), 0.5 (Δ), or 0.25 (×) with 1 mM glycerol and *M. gallisepticum* catalase-producing transformant 56A at an OD<sub>550</sub> of 0.75 with 1 mM glycerol. Results are from one representative experiment. doi:10.1371/journal.pone.0105188.g005

consistent with the presence of catalase activity in only *M. iowae*. Furthermore, *M. iowae* was capable of breaking down H<sub>2</sub>O<sub>2</sub> produced by *M. genitalium*, a species previously shown to be a robust H<sub>2</sub>O<sub>2</sub>-producer [39]. Cells of both species were grown to mid-log phase in media containing 3% glycerol, which stimulates H<sub>2</sub>O<sub>2</sub> production [19,39]. Upon reaching mid-log phase, the cultures were combined and H<sub>2</sub>O<sub>2</sub> concentration was monitored over time (Fig. 2). When an equal volume of *M. iowae* culture was added to the *M. genitalium* culture, the H<sub>2</sub>O<sub>2</sub> concentration fell below detectable levels within 2 min. This decrease in the amount of H<sub>2</sub>O<sub>2</sub> was not observed when warm SP-4 broth was added to *M. genitalium*. A repeated measures ANOVA revealed a significant difference between these two groups ( $F(1,8) = 56.783$ ,  $p < 0.05$ ), and significant differences were observed from 45 sec onward during the assay as determined by unpaired Student's T-test ( $p < 0.05$ ). These data are consistent with catalase activity by *M. iowae*.

#### Expression of *M. iowae katE* in a hydrogen peroxide-producing mycoplasma

To test the role of *katE* in the catalase activity of *M. iowae*, *M. gallisepticum* was transformed with the gene either without or with a C-terminal 6X-His tag to create transformant series 55 and 56, respectively [30]. This species was chosen as the recipient due to its

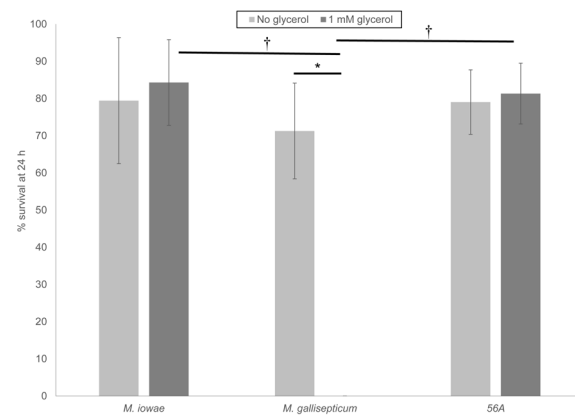

**Figure 6. Toxicity of mycoplasmas to *C. elegans*.** Toxicity was measured in the absence (light grey bars) and presence (dark grey bars) of 1 mM glycerol. Error bars, SD. \*,  $p < 0.05$  as determined by unpaired Student's T-test. †  $p < 0.05$  as determined by one-way ANOVA and Tukey's *post hoc* test. doi:10.1371/journal.pone.0105188.g006

ability to produce H<sub>2</sub>O<sub>2</sub> and lack of other known toxins [40,41]. We included the coding region of *katE* plus 239 nucleotides upstream of the start codon, anticipating that this region included a promoter, although no promoter sequences could be unambiguously identified by sequence inspection (not shown). Immunoblotting with anti-6X-His antibodies confirmed production by transformants of a protein migrating at approximately 60 kDa, the predicted size of *M. iowae* catalase, that was absent from untransformed *M. gallisepticum* (Fig. 3a). Addition of 3% H<sub>2</sub>O<sub>2</sub> to all transformants resulted in bubbling, indicative of the presence of catalase activity (Table 1). Transformants were also analyzed for H<sub>2</sub>O<sub>2</sub> production in the presence of 100 μM glucose or glycerol as previously described [14]. *M. iowae* produced no detectable H<sub>2</sub>O<sub>2</sub> under any test conditions, including incubation with up to 3 mM glycerol (Table 1 and not shown). Although the parent strain produced robust H<sub>2</sub>O<sub>2</sub> in the presence of 100 μM glycerol, all *katE* transformants displayed decreased H<sub>2</sub>O<sub>2</sub> production, approaching or at undetectable levels. Individual transformants produced varying amounts of H<sub>2</sub>O<sub>2</sub>, but always less than the parent strain. There was a statistically significant difference between strains as determined by a one-way ANOVA ( $F(7,21) = 73.102$ ,  $p < 0.0001$  for 100 μM glucose and  $F(7,22) = 96.076$ ,  $p < 0.0001$  for 100 μM glycerol). A Tukey *post hoc* test revealed significant differences between *M. gallisepticum* and all catalase-containing strains, but no statistical differences between *M. iowae* and catalase-containing transformants following treatment with both carbohydrates, suggesting that *katE* is responsible for the catalase activity present in *M. iowae*. Because it was possible that introduction of the transposon carrying *katE* interfered with glycerol metabolism and therefore H<sub>2</sub>O<sub>2</sub> production, PCR was performed on the *glpFOK* putative operon, which constitute the only genes known to be involved in glycerol metabolism in this organism. Wild-type *M. gallisepticum* and all transformants displayed a product of ~5.7 kb (Fig. 3b). These results are consistent with reduction in H<sub>2</sub>O<sub>2</sub> accumulation in transformants being due solely to catalase activity provided by *M. iowae katE*.

#### H<sub>2</sub>O<sub>2</sub>-mediated toxicity in a *C. elegans* model

Multiple studies have demonstrated the susceptibility of *C. elegans* to H<sub>2</sub>O<sub>2</sub> [42,43], but a *C. elegans* model for toxicity of H<sub>2</sub>O<sub>2</sub> from mycoplasmas has never been reported. When *C.*

*C. elegans* L1 larvae were incubated with increasing concentrations of H<sub>2</sub>O<sub>2</sub> at room temperature, a significant decrease in survival at 24 h was evident as indicated by a one-way ANOVA ( $F(3,26) = 5.911$ ,  $p = 0.003$ ) (Fig. 4). To maximize H<sub>2</sub>O<sub>2</sub> output by *M. gallisepticum* after 24 h, thereby allowing for the most easily discernible results in subsequent assays, various concentrations of glycerol and *M. gallisepticum* cells were analyzed at room temperature to mimic conditions necessary for *C. elegans* toxicity assays (Fig. 5). H<sub>2</sub>O<sub>2</sub> production by wild-type *M. gallisepticum* reached a distinct maximum level when the glycerol concentration was increased to 1 mM (Fig. 5a). There was a statistically significant difference between different glycerol concentrations at the same time point as determined by a one-way ANOVA ( $F(7,6) = 124.842$ ,  $p < 0.0001$  at 24 hr and  $F(7,6) = 20.591$ ,  $p < 0.0001$  at 48 hr). A Tukey post hoc test revealed a significant difference associated with treatment with 100  $\mu$ M glycerol but not with higher concentrations. No statistically significant differences were observed for any glycerol concentrations with an increase in incubation time from 24 to 48 hrs. OD<sub>550</sub> values ranging from 0.5 to 1.0 yielded the same level of H<sub>2</sub>O<sub>2</sub> (Fig. 5b); therefore, we chose to use cells at an OD<sub>550</sub> of 0.75 in the *C. elegans* assays. When transformant 56A, representing the *katE* transformants, was analyzed for H<sub>2</sub>O<sub>2</sub> production with cells at an OD<sub>550</sub> of 0.75 in the presence of 1 mM glycerol at room temperature, H<sub>2</sub>O<sub>2</sub> was detectable, but present at more than an order of magnitude lower than wild-type *M. gallisepticum*, with H<sub>2</sub>O<sub>2</sub> production peaking early and becoming undetectable after 10 h (Fig. 5b). Thus, the amount of H<sub>2</sub>O<sub>2</sub> produced by both wild-type *M. gallisepticum* and transformant 56A under the conditions used for the *C. elegans* studies is markedly greater than those originally obtained with 100  $\mu$ M glycerol over 2 h of incubation at 37°C.

To compare H<sub>2</sub>O<sub>2</sub> toxicity in the presence and absence of catalase-containing mycoplasmas, pre-counted *C. elegans* L1 larvae were incubated with 1 mL of *M. iowae*, *M. gallisepticum*, and *M. gallisepticum* transformant 56A with catalase activity at an OD<sub>550</sub> of 0.75 in the presence or absence of 1 mM glycerol at room temperature, and survival was measured at 24 h (Fig. 6). In the absence of glycerol, leaving H<sub>2</sub>O<sub>2</sub> production absent or minimal (see Table 1), incubation with all strains resulted in 60–80% survival of *C. elegans*, which were statistically similar as determined by a one-way ANOVA ( $F(2,21) = 0.962$ ,  $p = 0.398$ ). Statistically significant differences were found between experiments with and without glycerol for *M. gallisepticum*, but not for *M. iowae* or transformant 56A as determined by Student's T-test. Wild-type *M. gallisepticum* allowed no survival of *C. elegans* at 24 h due to the high level of H<sub>2</sub>O<sub>2</sub> production. Transformant 56A allowed increased survival of *C. elegans* as compared to wild-type *M. gallisepticum*, paralleling differences observed in H<sub>2</sub>O<sub>2</sub> production under assay conditions (Fig. 5b). Catalase-producing *M. iowae* and transformant 56A were both statistically significantly different from untransformed *M. gallisepticum* in the presence of glycerol as determined by a one-way ANOVA ( $F(2,21) = 292.531$ ,  $p < 0.001$ ) and Tukey's *post hoc* test.

## Discussion

Despite the presence in *M. iowae* of an entire set of genes sufficient for importing and using free glycerol as a metabolite, this organism produced no detectable H<sub>2</sub>O<sub>2</sub> under any conditions tested. We speculated that the absence of H<sub>2</sub>O<sub>2</sub> accumulation was due to the presence and activity of a catalase, likely intracellular, which provides *M. iowae* with the ability to break down exogenous H<sub>2</sub>O<sub>2</sub> and might remove H<sub>2</sub>O<sub>2</sub> generated through the glycerol catabolism pathway before it accumulates to detectable levels.

Consistent with this hypothesis, *M. gallisepticum* displayed catalase activity upon transformation with *M. iowae katE*. Significantly, catalase activity resulted in reduced or even undetectable H<sub>2</sub>O<sub>2</sub> production by *M. gallisepticum* transformants, and a *C. elegans* toxicity assay revealed a correlation between reduced H<sub>2</sub>O<sub>2</sub> production and decreased toxicity. A possible explanation for the absence of H<sub>2</sub>O<sub>2</sub> produced by *M. iowae* in the presence of glycerol is that the GlpFKO pathway experiences low flux and produces only a small amount of H<sub>2</sub>O<sub>2</sub>. A second possibility is that *M. iowae* has a defect in its GlpFKO pathway resulting in the inability to utilize glycerol as a metabolite and therefore an absence of H<sub>2</sub>O<sub>2</sub> production. Finally, the catalase activity may simply be so great as to prevent any accumulation of H<sub>2</sub>O<sub>2</sub> generated by glycerol catabolism. Although the presence of these genes suggests that there is a use for these proteins in normal cellular function, further testing is needed to determine their expression, activity, and regulation. There might, for example, be conditions under which either catalase activity is reduced or glycerol catabolism is increased. Preliminary data suggest that a close relative of *M. iowae*, *M. penetrans*, produces minimal H<sub>2</sub>O<sub>2</sub> amounts from glycerol catabolism (J. T. Newman and M. F. B., unpublished data), raising the possibility that this pathway is not very productive in this clade of mycoplasmas. Development of genetic tools for *M. iowae*, which have not been described, would be valuable for directly addressing the question of H<sub>2</sub>O<sub>2</sub> production.

Our finding of reduced or no H<sub>2</sub>O<sub>2</sub> production in the presence of catalase suggests a fundamental incompatibility between the presence of catalase and the use of H<sub>2</sub>O<sub>2</sub> as a virulence factor by mycoplasmas, and provides insight into the correlation between the presence of glycerol catabolism genes and the use of H<sub>2</sub>O<sub>2</sub> for virulence. If H<sub>2</sub>O<sub>2</sub> is a widespread virulence factor among mycoplasmas, then this incompatibility is likely to explain the general absence of catalase from other mycoplasmas. The findings of this report support the idea that, although glycerol catabolism genes are widespread amongst mycoplasmas, their presence does not necessarily signal the use of H<sub>2</sub>O<sub>2</sub> for virulence. In addition to its function in utilizing glycerol as an energy source, recent work has illustrated the importance of this pathway in other biochemical functions, such as the production of lipids [44].

*C. elegans* has previously been used to assay toxicity of several bacterial species via production of toxic molecules and infectious processes. The susceptibility of *C. elegans* to H<sub>2</sub>O<sub>2</sub> has been well established and H<sub>2</sub>O<sub>2</sub>-mediated toxicity assays on solid media and in liquid have been used to study virulence caused via this mechanism [42,43], although this is the first report of a *C. elegans* assay addressing mycoplasma toxicity. There are several benefits of using this method as opposed to standard tissue culture models. First, *C. elegans* is a more complex model than tissue culture cells, possessing several of the same innate immune defense mechanisms as more complex organisms [45], although whether this feature is important in this particular study is not clear. Second, previous studies have established a time frame of 2–5 d until bacteria can adequately colonize the gut of *C. elegans* and therefore cause damage via an infectious process [43]. Any death observed in the first 48 h is therefore due to diffusible molecules like H<sub>2</sub>O<sub>2</sub>. Third, tissue culture models of virulence require infection for long periods of time, and they cannot distinguish damage caused by H<sub>2</sub>O<sub>2</sub>, which occurs rapidly, and damage caused by toxins, which occurs more slowly, without the use of mutants, which can be difficult at minimum to construct using currently available molecular techniques [14]. Although there are limitations associated with comparing results obtained from this method to those observed in the natural host, such as examining the impact of H<sub>2</sub>O<sub>2</sub> produced

from exogenous or host-derived carbohydrates, it serves as a good system for examination of strains deficient in H<sub>2</sub>O<sub>2</sub> production, such as the catalase-positive strains examined in this study.

One potential concern about the use of *C. elegans* as a reporter of H<sub>2</sub>O<sub>2</sub>-mediated toxicity is the question of whether binding of mycoplasmas to *C. elegans* impacts toxicity during the time frame required for these assays. Whether *M. iowae* binds to *C. elegans* under our experimental conditions, or under any conditions, is not known. Although *M. gallisepticum* can bind red blood cells at room temperature within 5 min [46], other pathogens with cell-associated toxins also bind externally to *C. elegans* within 2 d yet still require 4 d before any decrease in worm survival is observed [47]. Therefore, even though mycoplasmas might or might not bind to *C. elegans* during the 24-h incubation required for the toxicity assay employed in this study, one can be certain that any decrease in survival during this time frame is due to the production of diffusible molecules such as H<sub>2</sub>O<sub>2</sub> and not cell-associated toxins.

## Supporting Information

**Figure S1 Alignment of catalase proteins closely related to that of *M. iowae*.** The uppermost track plots alignment entropy, with hotter colors at more variable positions than colder ones. Beneath the entropy plot the sequence coordinates are given

## References

- Al-Ankari A-RS, Bradbury JM (1996) *Mycoplasma iowae*: a review. Avian Pathol 25: 205–229.
- Bradbury JM, Ideris A, Oo TT (1988) *Mycoplasma iowae* infection in young turkeys. Avian Pathol 17: 149–171.
- Trampel DW, Goll F Jr (1994) Outbreak of *Mycoplasma iowae* infection in commercial turkey poults. Avian Dis 38: 905–909.
- Ley DH, Marusak RA, Vivas EJ, Barnes HJ, Fletcher OJ (2010) *Mycoplasma iowae* associated with chondrodystrophy in commercial turkeys. Avian Pathol 39: 87–93.
- Shah-Majid M, Rosendal S (1986) Oral challenge of turkey poults with *Mycoplasma iowae*. Avian Dis 31: 365–369.
- Mirsalimi SM, Rosendal S, Julian RJ (1989) Colonization of the intestine of turkey embryos exposed to *Mycoplasma iowae*. Avian Dis 33: 310–315.
- Johansson K-E, Pettersson B (2002) Taxonomy of *Mollicutes*. In: Razin S, Herrmann R, editors. Molecular Biology and Pathogenicity of Mycoplasmas. Boston: Kluwer Academic/Plenum Publishers. pp. 1–30.
- Jurkovic DA, Newman JT, Balish MF (2012) Conserved terminal organelle morphology and function in *Mycoplasma penetrans* and *Mycoplasma iowae*. J Bacteriol 194: 2877–2883.
- Barber TL, Fabricant J (1971) Identification of *Mycoplasma* species: procedures for both characterization and purification. Appl Microbiol 21: 594–599.
- Bradbury JM (1983) *Mycoplasma iowae* – an avian mycoplasma with unusual properties. Yale J Biol Med 56: 912.
- Wei S, Guo Z, Li T, Zhang T, Li X, et al. (2012) Genome sequence of *Mycoplasma iowae* strain 695, an unusual pathogen causing deaths in turkeys. J Bacteriol 194: 547–548.
- Kaman TR, Baseman JB (2006) ADP-ribosylating and vacuolating cytotoxin of *Mycoplasma pneumoniae* represents unique virulence determinant among bacterial pathogens. Proc Natl Acad Sci USA 103: 6724–6729.
- Pilo P, Vilei EM, Peterhans E, Bonvin-Klotz L, Stoffel MH, et al. (2005) A metabolic enzyme as a primary virulence factor for *Mycoplasma mycoides* subsp. *mycoides* small colony. J Bacteriol 187: 6824–6831.
- Hames C, Halbedel S, Hoppert M, Frey J, Stülke J (2009) Glycerol metabolism is important for cytotoxicity of *Mycoplasma pneumoniae*. J Bacteriol 191: 747–753.
- Baeuerle PA, Henkel T (1994) Function and activation of NF- $\kappa$ B in the immune system. Annu Rev Immunol 12: 141–179.
- Brennan PC, Feinstein RN (1969) Relationship of hydrogen peroxide production by *Mycoplasma pulmonis* to virulence for catalase-deficient mice. J Bacteriol 98: 1036–1040.
- Houshaymi BM, Miles RJ, Nicholas RAJ (1997) Oxidation of glycerol differentiates African from European isolates of *Mycoplasma mycoides* subspecies *mycoides* SC (small colony). Vet Record 140: 182–183.
- Abdo E-M, Nicolet J, Miserez R, Gonçalves R, Regalla J, et al. (1998) Humoral and bronchial immune responses in cattle experimentally infected with *Mycoplasma mycoides* subsp. *mycoides* small colony type. Vet Microbiol 59: 109–122.
- Vilei EM, Frey J (2001) Genetic and biochemical characterization of glycerol uptake in *Mycoplasma mycoides* subsp. *mycoides* SC: its impact on H<sub>2</sub>O<sub>2</sub> production and virulence. Clin Diagn Lab Immunol 8: 85–92.
- Dhandayuthapani S, Blaylock MW, Bebear CM, Rasmussen WG, Baseman JB (2001) Peptide methionine sulfoxide reductase (MsrA) is a virulence determinant in *Mycoplasma genitalium*. J Bacteriol 183: 5645–5650.
- Zhang W, Baseman JB (2014) Functional characterization of osmotically inducible protein C (MG\_427) from *Mycoplasma genitalium*. J Bacteriol 196: 1012–1019.
- Tully JG, Rose DL, Whitcomb RF, Wenzel RP (1979) Enhanced isolation of *Mycoplasma pneumoniae* from throat washings with a newly-modified culture medium. J Infect Dis 139: 478–482.
- Simmons WL, Daubenspeck JM, Osborne JD, Balish MF, Waites KB, et al. (2013) Type 1 and type 2 strains of *Mycoplasma pneumoniae* form different biofilms. Microbiol 159: 737–747.
- Couronne O, Poliakov A, Bray N, Ishkhanov T, Ryabov D, et al. (2003) Strategies and tools for whole-genome alignments. Genome Res 13: 7.
- Altschul SF, Madden TL, Schäffer AA, Zhang J, Zhang Z, et al. (1997) Gapped BLAST and PSI-BLAST: a new generation of protein database search programs. Nucleic Acids Res 25: 3389–3402.
- Larkin MA, Blackshields G, Brown NP, Chenna R, McGettigan PA, et al. (2007). Clustal W and Clustal X version 2.0. Bioinformatics 23: 2947–2948.
- Perrière G, Gouy M (1996) WWW-Query: An on-line retrieval system for biological sequence banks. Biochimie 78: 364–369.
- Geourjon C, Deleage G (1995) SOPMA: significant improvements in protein secondary structure prediction by consensus prediction from multiple alignments. Comput Appl Biosci 13: 209–212.
- French CT, Lao P, Loraine AE, Matthews BT, Yu H, et al. (2008) Large-scale transposon mutagenesis of *Mycoplasma pulmonis*. Mol Microbiol 69: 67–76.
- Hedreya CT, Lee KK, Krause DC (1993) Transformation of *Mycoplasma pneumoniae* with Tn4001 by electroporation. Plasmid 30: 170–175.
- Lewis JA, Fleming JT (1995) Basic culture methods. In: Epstein, HF, Shakes, DC, editors. Methods in Cell Biology, Volume 48, *Caenorhabditis elegans*: Modern Biological Analysis of an Organism. Boston: Academic Press. pp. 3–29.
- Hong Y, García M, Levisohn S, Lysnyansky I, Leitinger V, et al. (2005) Evaluation of amplified fragment length polymorphism for differentiation of avian mycoplasma species. J Clin Microbiol 43: 909–912.
- Schmidl SR, Otto A, Luch-Senar M, Piñol J, Busse J, et al. (2011) A trigger enzyme in *Mycoplasma pneumoniae*: impact of the glycerophosphodiesterase GlpQ on virulence and gene expression. PLoS Pathog 7: e1002263. doi:10.1371/journal.ppat.1002263.
- Großhennig S, Schmidl SR, Busse J, Stülke J (2013) Implication of glycerol and phospholipid transporters in *Mycoplasma pneumoniae* growth and virulence. Infect Immun 81: 896–904.
- Berent LM, Messick JB (2003) Physical map and genome sequencing survey of *Mycoplasma haemofelis* (*Haemobartonella felis*). Infect Immun 71: 3657–3662.
- do Nascimento N, Guimaraes AM, Santos AP, SanMiguel PJ, Messick JB (2012) Complete genome sequence of *Mycoplasma haemocanis* strain Illinois. J Bacteriol 194: 1605–1606.



37. Shima S, Sordel-Klippert M, Brioukhanov A, Netrusov A, Linder D, et al. (2001) Characterization of a heme-dependent catalase from *Methanobrevibacter arboriphilus*. *Appl Environ Microbiol* 67: 3041–3045.
38. Marchler-Bauer A, Zheng C, Chitsaz F, Derbyshire MK, Geer LY, et al. (2013) CDD: conserved domains and protein three-dimensional structure. *Nucleic Acids Res* 41: D348–D352.
39. Martínez MA, Das K, Saikolappan S, Materon LA, Dhandayuthapani S (2013) A serine/threonine phosphatase encoded by MG\_207 of *Mycoplasma genitalium* is crucial for its virulence. *BMC Microbiol* 13: 44. doi: 10.1186/1471-2180-13-44.
40. Taylor RR, Mohan K, Miles RJ (1996) Diversity of energy-yielding substrates and metabolism in avian mycoplasmas. *Vet Microbiol* 51: 291–304.
41. Papazisi L, Gorton TS, Kutish G, Markham PF, Browning GF, et al. (2003) The complete genome sequence of the avian pathogen *Mycoplasma gallisepticum* strain R<sub>low</sub>. *Microbiol* 149: 2307–2316.
42. Jansen WTM, Bolm M, Balling R, Chhatwal GS, Schnabel R (2002) Hydrogen peroxide-mediated killing of *Caenorhabditis elegans* by *Streptococcus pyogenes*. *Infect Immun* 70: 5202–5207.
43. Moy TI, Mylonakis E, Calderwood SB, Ausubel FM (2004) Cytotoxicity of hydrogen peroxide produced by *Enterococcus faecium*. *Infect Immun* 72: 4512–4520.
44. Yus E, Maier T, Michalodimitrakis K, van Noort V, Yamada T, et al. (2009) Impact of genome reduction on bacterial metabolism and its regulation. *Science* 326: 1263–1268.
45. Ewbank JJ (2002) Tackling both sides of the host-pathogen equation with *Caenorhabditis elegans*. *Microbes Infect* 4: 247–256.
46. Banai M, Kahane I, Razin S, Bredt W (1978) Adherence of *Mycoplasma gallisepticum* to human erythrocytes. *Infect Immun* 21: 365–372.
47. Couillault C, Ewbank JJ (2002) Diverse bacteria are pathogens of *Caenorhabditis elegans*. *Infect Immun* 70: 4705–4707.
48. Hakansson KO, Brugna M, Tasse L (2004) The three-dimensional structure of catalase from *Enterococcus faecalis*. *Acta Crystallogr D Biol Crystallogr* 60: 1374–1380.
