# Supplementary material for: Reduction of Hydrogen Peroxide Accumulation and Toxicity by a Catalase from Mycoplasma iowae
Source: PubMed Central journal article supplement (PMC4134286; doi:10.1371/journal.pone.0105188), 2014-08-15
Supplement: pone.0105188.s001.pdf [file pone.0105188.s001.pdf]

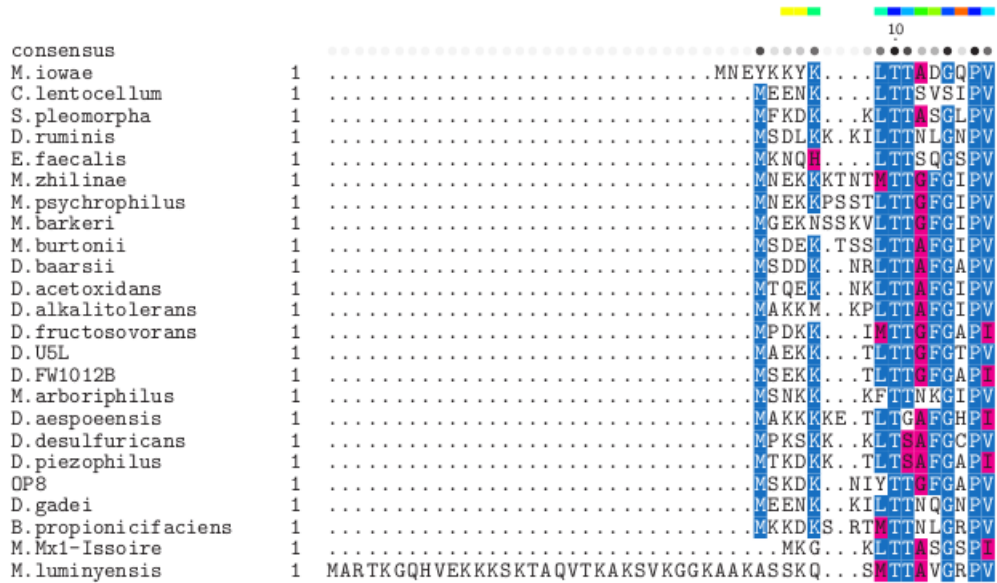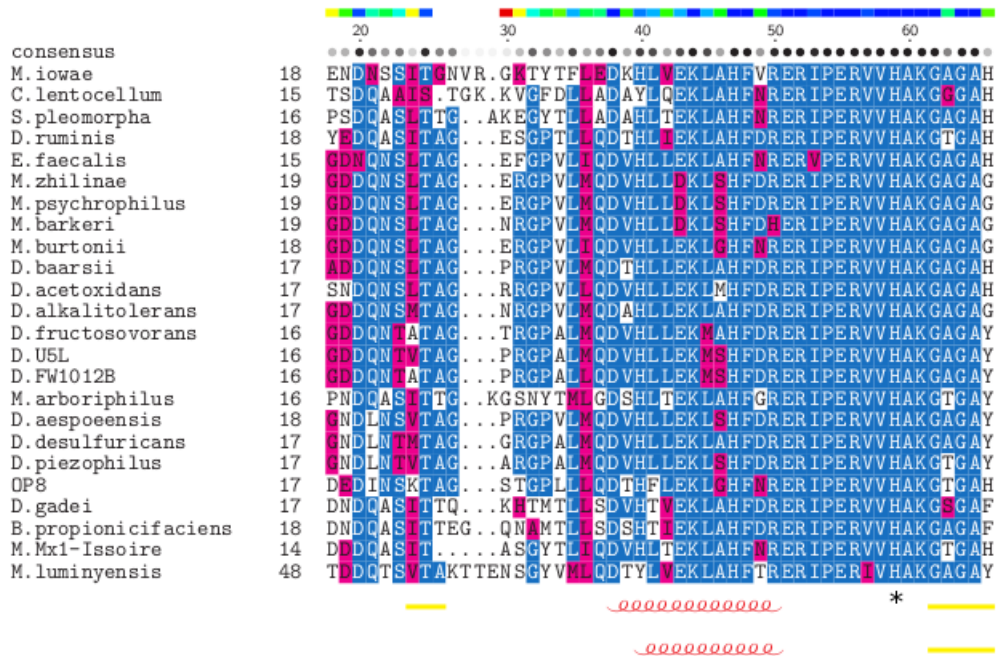









consensus  
M. iowae 367 PYNQRDG<sup>370</sup>MTV<sup>380</sup>NGNYGSLPNYQPS<sup>390</sup>TLKGASYVDD.SDKVFPQID<sup>400</sup>NGVVK  
C. lentocellum 362 LY<sup>370</sup>TQRDGNM<sup>380</sup>QVNGNMG<sup>390</sup>NVNYFPSSFVN.VVVSP.EVAPFP<sup>400</sup>IPVIGEIK  
S. pleomorpha 363 AK<sup>370</sup>YQRDGSMS<sup>380</sup>IGGNQCKE<sup>390</sup>PNYWPNSIEGQPKPD.ASFSP<sup>400</sup>QIEVQAILA  
D. ruminis 365 AN<sup>370</sup>YQRDGFMA<sup>380</sup>LDGNGGAS<sup>390</sup>PNYYPNSFGGPA<sup>400</sup>DP.QFAPFP<sup>400</sup>VDVAGMVS  
E. faecalis 361 VNN<sup>370</sup>YQRDGMRFN<sup>380</sup>.NGNSEI<sup>390</sup>NYEPNS<sup>400</sup>YTETPKED.PTAKISSFEV<sup>410</sup>EGNVS  
M. zhilinae 366 EN<sup>370</sup>YQRDGFMR<sup>380</sup>VDGNGGSG<sup>390</sup>PNYWPNSFNGPS<sup>400</sup>DP.DALE<sup>410</sup>FPFEVSGLAQ  
M. psychrophilus 366 EA<sup>370</sup>YQRDGFMR<sup>380</sup>VDGNGGSG<sup>390</sup>PNYWPNSFNGP<sup>400</sup>APDS.KALE<sup>410</sup>FAFKSGMAA  
M. barkeri 366 EN<sup>370</sup>YQRDGFMR<sup>380</sup>VDANGGSG<sup>390</sup>PNYWPNSFNGP<sup>400</sup>SPDS.VYLE<sup>410</sup>FPFGVSLAA  
M. burtonii 365 ET<sup>370</sup>YQRDGFMR<sup>380</sup>LDANGGSG<sup>390</sup>PNYWPNSFNGP<sup>400</sup>APDP.DALE<sup>410</sup>FPFEVSGKAD  
D. baarsii 364 ER<sup>370</sup>YQRDGFMR<sup>380</sup>TDDGGGAG<sup>390</sup>PNYWPNSFNGP<sup>400</sup>GPDA.AYL<sup>410</sup>EP<sup>410</sup>IP<sup>410</sup>LE<sup>410</sup>QAA  
D. acetoxidans 364 ER<sup>370</sup>YQRDGFMR<sup>380</sup>VDDNGGSG<sup>390</sup>PNYWPNSFNGP<sup>400</sup>APDP.ATE<sup>410</sup>EP<sup>410</sup>IP<sup>410</sup>LE<sup>410</sup>GLAG  
D. alkalitolerans 364 EM<sup>370</sup>YQRDGFMR<sup>380</sup>TDDGGGSG<sup>390</sup>PNYWPNSFNGP<sup>400</sup>APHA.SAK<sup>410</sup>EP<sup>410</sup>GFPV<sup>410</sup>HDHAG  
D. fructosovorans 363 AQ<sup>370</sup>NYQRDGFMR<sup>380</sup>VDDGGGSG<sup>390</sup>PNYWPNSFNGP<sup>400</sup>APDA.AAL<sup>410</sup>EP<sup>410</sup>DYPV<sup>410</sup>HGEAG  
D. U5L 363 VSN<sup>370</sup>YQRDGFMR<sup>380</sup>TDDGGGAG<sup>390</sup>PNYWPNSFNGP<sup>400</sup>APDP.EAL<sup>410</sup>EP<sup>410</sup>IP<sup>410</sup>LE<sup>410</sup>GEAG  
D. FW1012B 363 VAN<sup>370</sup>YQRDGFMR<sup>380</sup>TDDGGGAG<sup>390</sup>PNYWPNSFNGP<sup>400</sup>APDP.EAL<sup>410</sup>EP<sup>410</sup>IP<sup>410</sup>LE<sup>410</sup>GEAG  
M. arboriphilus 364 VN<sup>370</sup>YQRDGPMT<sup>380</sup>YTDNGGSG<sup>390</sup>PNYYPNSF<sup>400</sup>.DGPEVD.ETV<sup>410</sup>TP<sup>410</sup>TIE<sup>410</sup>KAEIN  
D. aespoensis 365 EK<sup>370</sup>YQRDGMRTD<sup>380</sup>HNGGSG<sup>390</sup>PNYWPNSFNGP<sup>400</sup>APDN.TSI<sup>410</sup>EP<sup>410</sup>IP<sup>410</sup>LDG<sup>410</sup>GGG  
D. desulfuricans 364 EM<sup>370</sup>NYQRDGFMR<sup>380</sup>VDHNGGSG<sup>390</sup>PNYWPNSF<sup>400</sup>GPAPDN.VSI<sup>410</sup>EP<sup>410</sup>IP<sup>410</sup>LE<sup>410</sup>GVAQ  
D. piezophilus 364 EQ<sup>370</sup>NYQRDGS<sup>380</sup>MRVDHNGGSG<sup>390</sup>PNYWPNS<sup>400</sup>YHGPAPDN.ISN<sup>410</sup>EP<sup>410</sup>YIP<sup>410</sup>LE<sup>410</sup>GVGG  
OP8 364 VNY<sup>370</sup>YQRDGF<sup>380</sup>CFGD<sup>390</sup>NSG<sup>400</sup>DSPNYYPNSFNGG<sup>410</sup>PEPQP.TAA<sup>410</sup>EP<sup>410</sup>GFDV<sup>410</sup>SGTAG  
D. gadei 363 MHN<sup>370</sup>YQRDGHM<sup>380</sup>NTGR<sup>390</sup>IFG<sup>400</sup>P<sup>410</sup>TAN<sup>410</sup>YYPNS<sup>410</sup>VN<sup>410</sup>VPY<sup>410</sup>GEADGI<sup>410</sup>PEAPVITFRD<sup>410</sup>MAIA  
B. propionificiens 365 FGH<sup>370</sup>YQRDGMN<sup>380</sup>FK.QEAG<sup>390</sup>PNYYPNS<sup>400</sup>FDP<sup>410</sup>GPT<sup>410</sup>PKD.KWAT<sup>410</sup>TP<sup>410</sup>IDV<sup>410</sup>SGMAA  
M. Mx1-Issoire 357 LN<sup>370</sup>YQRDGM<sup>380</sup>SYG.IV<sup>390</sup>G<sup>400</sup>TDP<sup>410</sup>NYYPNS<sup>410</sup>VNP<sup>410</sup>DAPADP.ISYT<sup>410</sup>PE<sup>410</sup>ASIV<sup>410</sup>DDEAM  
M. luminyensis 398 VY<sup>370</sup>NE<sup>380</sup>RDGHM<sup>390</sup>NTGR<sup>400</sup>IFG<sup>410</sup>P<sup>410</sup>TAN<sup>410</sup>YYPNS<sup>410</sup>VN<sup>410</sup>VPY<sup>410</sup>GEADGI<sup>410</sup>PEAPVITFRD<sup>410</sup>MAIA

oooo

consensus  
M. iowae 416 GRFNYP.LE<sup>420</sup>VD<sup>430</sup>DFVCPGL<sup>440</sup>LDK<sup>450</sup>VMDDAKRS<sup>460</sup>RLHNTAST<sup>460</sup>KLADVS.IQY  
C. lentocellum 410 .RHVIE.SI<sup>420</sup>AD<sup>430</sup>DFVCPG<sup>440</sup>EFYRAM<sup>450</sup>TSSDDK.AHF<sup>460</sup>LYN<sup>460</sup>VTDN<sup>460</sup>KHADPA.IQY  
S. pleomorpha 412 .RHERP.SE<sup>420</sup>ID<sup>430</sup>FI<sup>440</sup>CPG<sup>450</sup>E<sup>460</sup>LYR<sup>460</sup>VMN<sup>460</sup>EQD<sup>460</sup>KEHLINNIASH<sup>460</sup>INAKH.IQY  
D. ruminis 413 .RHPYV.LS<sup>420</sup>ID<sup>430</sup>DFVQAG<sup>440</sup>E<sup>450</sup>LYR<sup>460</sup>VM<sup>460</sup>SQD<sup>460</sup>DRANL<sup>460</sup>VSNICDS<sup>460</sup>GQAQQR.IQL  
E. faecalis 409 .NYSYN...<sup>420</sup>CD<sup>430</sup>HFT<sup>440</sup>QANALYN<sup>450</sup>.<sup>460</sup>ILPSE<sup>460</sup>EKEN<sup>460</sup>L<sup>460</sup>IN<sup>460</sup>NI<sup>460</sup>AAS<sup>460</sup>LG<sup>460</sup>VKNQEI<sup>460</sup>IA  
M. zhilinae 414 .RTPYT.HP<sup>420</sup>NDD<sup>430</sup>DFVCPG<sup>440</sup>NLYR<sup>450</sup>VM<sup>460</sup>DD<sup>460</sup>EAR<sup>460</sup>THLVGN<sup>460</sup>IVSH<sup>460</sup>SGAVKR.IQL  
M. psychrophilus 414 .RTPYT.HP<sup>420</sup>NDD<sup>430</sup>DFVQAG<sup>440</sup>NLYR<sup>450</sup>VM<sup>460</sup>NDE<sup>460</sup>DRKN<sup>460</sup>LG<sup>460</sup>NI<sup>460</sup>VSH<sup>460</sup>SGA<sup>460</sup>IKS.IQL  
M. barkeri 414 .RTL<sup>420</sup>YT.HP<sup>430</sup>NDD<sup>440</sup>DFVQAG<sup>450</sup>NLYR<sup>460</sup>VM<sup>460</sup>T<sup>460</sup>DY<sup>460</sup>DR<sup>460</sup>ENLVGN<sup>460</sup>IVSH<sup>460</sup>SGAAQKR.IQL  
M. burtonii 413 .RTPYV.HS<sup>420</sup>NDD<sup>430</sup>DFVQAG<sup>440</sup>NLYR<sup>450</sup>VM<sup>460</sup>DD<sup>460</sup>QAR<sup>460</sup>ENLVGN<sup>460</sup>IVSH<sup>460</sup>SGAAQKR.IQL  
D. baarsii 412 .RTPYG.HP<sup>420</sup>NDD<sup>430</sup>DFVQAG<sup>440</sup>NLYR<sup>450</sup>VM<sup>460</sup>T<sup>460</sup>DQ<sup>460</sup>DR<sup>460</sup>HLVGN<sup>460</sup>IVSH<sup>460</sup>LAGALPR.IQL  
D. acetoxidans 412 .RYPYR.FP<sup>420</sup>NDD<sup>430</sup>DFVQAG<sup>440</sup>NLYR<sup>450</sup>VM<sup>460</sup>T<sup>460</sup>DR<sup>460</sup>D<sup>460</sup>HLVGN<sup>460</sup>IVSH<sup>460</sup>LAGA<sup>460</sup>QKR.IQY  
D. alkalitolerans 412 .RFAYT.HP<sup>420</sup>NDD<sup>430</sup>DFVQAG<sup>440</sup>DLYR<sup>450</sup>VM<sup>460</sup>SK<sup>460</sup>DR<sup>460</sup>DNLVGN<sup>460</sup>IVSH<sup>460</sup>LAGA<sup>460</sup>QKR.IQL  
D. fructosovorans 411 .RHAYA.HP<sup>420</sup>NDD<sup>430</sup>DHS<sup>440</sup>CPG<sup>450</sup>E<sup>460</sup>LYR<sup>460</sup>AM<sup>460</sup>ND<sup>460</sup>MD<sup>460</sup>REHLVGN<sup>460</sup>IVSH<sup>460</sup>KN<sup>460</sup>AVPR.IQK  
D. U5L 411 .RFAYT.HP<sup>420</sup>NDD<sup>430</sup>DFVQAG<sup>440</sup>DLYR<sup>450</sup>VM<sup>460</sup>SK<sup>460</sup>DR<sup>460</sup>DNLVGN<sup>460</sup>IVSH<sup>460</sup>LAGA<sup>460</sup>QKR.IQK  
D. FW1012B 411 .RFASY.HP<sup>420</sup>NDD<sup>430</sup>DFVQAG<sup>440</sup>DLYR<sup>450</sup>VM<sup>460</sup>SK<sup>460</sup>DR<sup>460</sup>DNLVGN<sup>460</sup>IVSH<sup>460</sup>LAGA<sup>460</sup>QKR.IQK  
M. arboriphilus 412 .RHPRP.VE<sup>420</sup>VD<sup>430</sup>DFVCPG<sup>440</sup>E<sup>450</sup>LYR<sup>460</sup>VM<sup>460</sup>SD<sup>460</sup>QD<sup>460</sup>DR<sup>460</sup>HLVGN<sup>460</sup>IVSH<sup>460</sup>LAGA<sup>460</sup>QKR.IQY  
D. aespoensis 413 .RHEA.HK<sup>420</sup>NDD<sup>430</sup>DFVCPG<sup>440</sup>NLYR<sup>450</sup>VM<sup>460</sup>TE<sup>460</sup>QDRANL<sup>460</sup>VSNILGS<sup>460</sup>LG<sup>460</sup>QTPK.IQL  
D. desulfuricans 412 .RHVYT.HP<sup>420</sup>NDD<sup>430</sup>DFVCPG<sup>440</sup>TLYSV<sup>450</sup>VM<sup>460</sup>TE<sup>460</sup>QDRKNL<sup>460</sup>VSNIVGS<sup>460</sup>QS<sup>460</sup>VPP.IQL  
D. piezophilus 412 .RHEAT.HP<sup>420</sup>NDD<sup>430</sup>DFVCPG<sup>440</sup>TLYGT<sup>450</sup>VM<sup>460</sup>SD<sup>460</sup>QDR<sup>460</sup>THL<sup>460</sup>IN<sup>460</sup>ILGS<sup>460</sup>ES<sup>460</sup>VPTP.IQL  
OP8 412 .RHPYT.LS<sup>420</sup>DD<sup>430</sup>DFVQAG<sup>440</sup>E<sup>450</sup>LYR<sup>460</sup>VM<sup>460</sup>T<sup>460</sup>DR<sup>460</sup>D<sup>460</sup>HLVGN<sup>460</sup>IVSH<sup>460</sup>LAGA<sup>460</sup>QKR.IQL  
D. gadei 410 .RHEYP.LG<sup>420</sup>ID<sup>430</sup>DFVQAG<sup>440</sup>ALYS<sup>450</sup>AM<sup>460</sup>SD<sup>460</sup>YDR<sup>460</sup>SNL<sup>460</sup>IS<sup>460</sup>NI<sup>460</sup>VGH<sup>460</sup>KN<sup>460</sup>AAQQR.IQY  
B. propionificiens 411 .RHEYE.VG<sup>420</sup>ID<sup>430</sup>DFVQAG<sup>440</sup>DLYAK<sup>450</sup>VM<sup>460</sup>T<sup>460</sup>QD<sup>460</sup>R<sup>460</sup>THL<sup>460</sup>IN<sup>460</sup>ILGH<sup>460</sup>KGA<sup>460</sup>QKR.IQL  
M. Mx1-Issoire 405 .RHQVP.ID<sup>420</sup>VD<sup>430</sup>DFVQAG<sup>440</sup>ALYS<sup>450</sup>AM<sup>460</sup>SD<sup>460</sup>YDR<sup>460</sup>SNL<sup>460</sup>IS<sup>460</sup>NI<sup>460</sup>VGH<sup>460</sup>KN<sup>460</sup>AAQQR.IQY  
M. luminyensis 448 .RHRVPETD<sup>420</sup>DD<sup>430</sup>DFVQAG<sup>440</sup>E<sup>450</sup>LYR<sup>460</sup>VM<sup>460</sup>SD<sup>460</sup>QD<sup>460</sup>DR<sup>460</sup>HLVGN<sup>460</sup>IVSH<sup>460</sup>LAGA<sup>460</sup>QKR.IQY

oooooooooooooooooooooooooooo

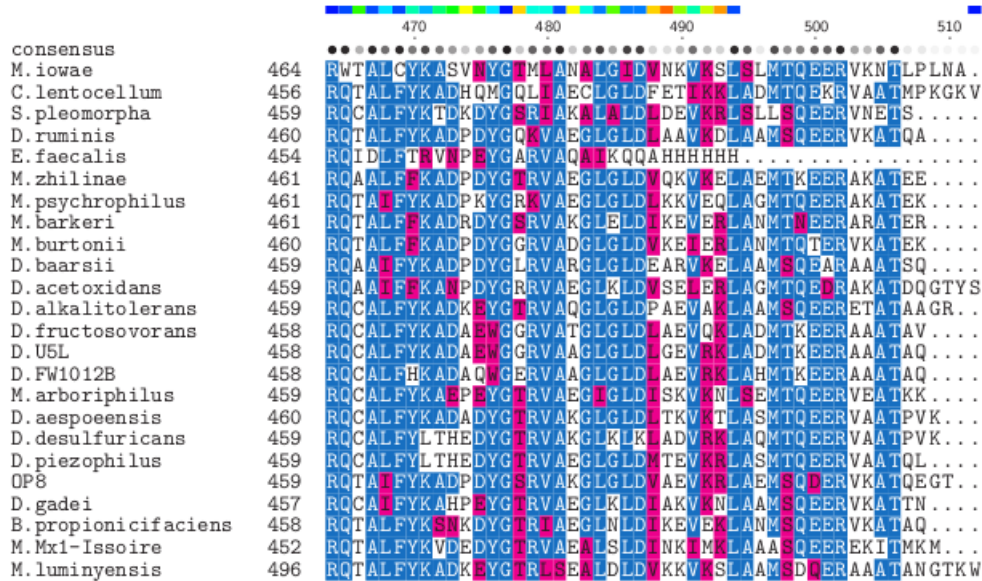

.....

- [X] non conserved
- [X] similar
- [X] ≥ 50% conserved
- \* Heme Binding site
